# Supplementary material for: Dynamics of Micronutrient Uptake and Removal by Three Modern Runner Peanut Cultivars
Source: MDPI journal article supplement (doi:10.3390/crops3020010), 2023-04-11
Supplement: s1 [file s1]

Archive with 1 entries (1 files):
- crops-2223691-supplementary.pdf
