# Supplementary material for: Dynamics of Micronutrient Uptake and Removal by Three Modern Runner Peanut Cultivars
Source: MDPI journal article supplement (doi:10.3390/crops3020010), 2023-04-11
Supplement: s1 [file s1 › crops-2223691-supplementary.pdf]

# Dynamics of Micronutrient Uptake and Removal by Three Modern Runner Peanut Cultivars

Carlos Alexandre Costa Crusciol <sup>1,\*</sup>, José Roberto Portugal <sup>1</sup>, João William Bossolani <sup>1</sup>, Luiz Gustavo Moretti <sup>1</sup>, Adalton Mazetti Fernandes <sup>2</sup>, Adônis Moreira <sup>3</sup>, Jader Luis Nantes Garcia <sup>4</sup>, Gleize Leviski de Brito Garcia <sup>4</sup>, Cristiane Pilon <sup>5</sup> and Heitor Cantarella <sup>6,\*</sup>

<sup>1</sup> Department of Crop Science, College of Agricultural Sciences, São Paulo State University (UNESP), Botucatu 18610-034, São Paulo, Brazil

<sup>2</sup> Center of Research for Tropical Tubers and Starches (CERAT), São Paulo State University (UNESP), Botucatu 18610-034, São Paulo, Brazil

<sup>3</sup> Embrapa Soybean, Carlos João Strass Highway, Londrina 86085-981, Paraná, Brazil

<sup>4</sup> Department of Forest, Soil and Environmental Sciences, College of Agricultural Sciences, São Paulo State University (UNESP), Botucatu 18610-034, São Paulo, Brazil

<sup>5</sup> College of Agricultural and Environmental Science, University of Georgia, 2356 Rainwater Road, Tifton, GA 31793, USA

<sup>6</sup> Agronomic Institute of Campinas (IAC), Soils and Environmental Resources Center, Av. Barão de Itapura 1481, Campinas 13020-902, São Paulo, Brazil

\* Correspondence: carlos.crusciol@unesp.br (C.A.C.C.); cantarella@iac.sp.gov.br (H.C.)

**Table S1.** Rainfall, maximum and minimum temperatures at Botucatu, São Paulo, Brazil, during the study period and averages.

| Climate characteristics | Month     |         |          |       |       |      |
|-------------------------|-----------|---------|----------|-------|-------|------|
|                         | December  | January | February | March | April | May  |
|                         | 2014/2015 |         |          |       |       |      |
| Monthly rain (mm)       | 265       | 256     | 252      | 265   | 46    | 99   |
| Mean max. Temp (°C)     | 28.6      | 31.7    | 28.4     | 27.1  | 27.0  | 23.4 |
| Mean min. Temp (°C)     | 15.5      | 19.1    | 18.1     | 17.2  | 16.1  | 13.4 |
